1 **The Transcriptome of the Avian Malaria Parasite**  
2 ***Plasmodium ashfordi* Displays Host-Specific Gene**  
3 **Expression**

4  
5  
6  
7  
8 **Running title**

9 The Transcriptome of *Plasmodium ashfordi*

10  
11 **Authors**

12 Elin Videvall<sup>1</sup>, Charlie K. Cornwallis<sup>1</sup>, Dag Ahrén<sup>1,3</sup>, Vaidas Palinauskas<sup>2</sup>, Gediminas Valkiūnas<sup>2</sup>,  
13 Olof Hellgren<sup>1</sup>

14  
15 **Affiliation**

16 <sup>1</sup>Department of Biology, Lund University, Lund, Sweden

17 <sup>2</sup>Institute of Ecology, Nature Research Centre, Vilnius, Lithuania

18 <sup>3</sup>National Bioinformatics Infrastructure Sweden (NBIS), Lund University, Lund, Sweden

19  
20 **Corresponding authors**

21 Elin Videvall ([elin.videvall@biol.lu.se](mailto:elin.videvall@biol.lu.se))

22 Olof Hellgren ([olof.hellgren@biol.lu.se](mailto:olof.hellgren@biol.lu.se))

23

24

## 25 Abstract

26

27 Malaria parasites (*Plasmodium* spp.) include some of the world's most widespread and virulent  
28 pathogens, infecting a wide array of vertebrates. Our knowledge of the molecular mechanisms these  
29 parasites use to invade and exploit hosts other than mice and primates is, however, extremely limited.  
30 How do *Plasmodium* adapt to individual hosts and to the immune response of hosts throughout an  
31 infection? To better understand parasite plasticity, and identify genes that are conserved across the  
32 phylogeny, it is imperative that we characterize transcriptome-wide gene expression from non-model  
33 malaria parasites in multiple host individuals. Here, we used high-throughput Illumina RNA-  
34 sequencing on blood from wild-caught Eurasian siskins experimentally infected with a clonal strain of  
35 the avian malaria parasite, *Plasmodium ashfordi* (lineage GRW2). By using a multi-step approach to  
36 filter out all host transcripts, we successfully assembled the blood-stage transcriptome of *P. ashfordi*.  
37 A total of 11 954 expressed parasite transcripts were identified, and 7 860 were annotated with protein  
38 information. We further quantified gene expression levels of all parasite transcripts across three hosts  
39 during two infection stages – peak and decreasing parasitemia. Interestingly, parasites from the same  
40 host during different infection stages displayed remarkably similar expression profiles, but show large  
41 differences across hosts. This indicates that *P. ashfordi* adjusts its gene expression to specific host  
42 individuals, but contrary to expectation does not markedly change expression across different stages  
43 of infection. Finally, we examined genome-wide sequence similarity between *P. ashfordi* and other  
44 apicomplexan species, and searched for candidate genes involved in red blood cell invasion. The  
45 majority of transcripts were most similar to the human parasite *Plasmodium falciparum*, and a large  
46 number of invasion genes were discovered, suggesting conserved red blood cell invasion strategies  
47 between mammalian and avian *Plasmodium* spp. The transcriptome of *P. ashfordi* and its host-  
48 specific gene expression over two infection stages advances our understanding of *Plasmodium*  
49 plasticity and will become a valuable resource as it allows for further studies analyzing gene evolution  
50 and comparisons of parasite gene expression.

51

52

53

### 54 **Keywords**

55 *Plasmodium*, transcriptome, RNA-seq, malaria, gene expression, host-parasite interaction

56

57

## 58 Introduction

59

60 The apicomplexan parasites of the genus *Plasmodium* (malaria parasites) encompass a worldwide  
61 distribution and infect a multitude of vertebrate hosts, including reptiles, birds and mammals  
62 (Garnham, 1966). Their virulence can be highly variable between different strains and species. Some  
63 induce mild pathogenic effects on hosts and some cause severe disease, leading to high mortality rates  
64 (Palinauskas et al., 2008). Host individuals and host species also differ in their resistance and  
65 tolerance to malaria, and this interaction between host and parasite ultimately determines disease  
66 severity. Furthermore, the molecular response of hosts changes during the course of infection and  
67 creates a dynamic environment in which the parasites need to accommodate. Nevertheless, our  
68 understanding of how malaria parasites respond molecularly to different host individuals and to  
69 changes in the host immune defense over time is very limited.

70

71 Parasites of two clades in *Plasmodium* have been extensively studied from a molecular perspective,  
72 murine and primate parasites. We have learned a great deal of how malaria parasites of humans  
73 evolved and function by studying their rodent-infecting relatives. The majority of studies investigating  
74 gene expression in malaria parasites have been conducted using artificially selected cell lines (*in*  
75 *vitro*) or tissue cultures (*ex vivo*). This has provided tremendous insight into the biology of  
76 *Plasmodium* life stages (e.g. Bozdech et al., 2003; Hall et al., 2005; Otto et al., 2010; Siegel et al.,  
77 2014). However, major discrepancies in parasite expression between cultures and live animals (*in*  
78 *vivo*) have been documented (Lapp et al., 2015). A wide range of host environmental factors are  
79 absent in the *in vitro* systems, for example temperature fluctuations, inflammatory and immune  
80 effector molecules, hormones, metabolites, microenvironments, and varying levels of oxygen, pH, and  
81 glucose (LeRoux et al., 2009). Parasites cultured outside hosts reflect this with different expression  
82 patterns, and markedly downregulate important vaccine candidate genes such as cell surface antigens  
83 (Daily et al., 2005; Siau et al., 2008). The natural host environment, including genotypic and  
84 immunological cues, may therefore strongly affect the transcriptional responses of malaria parasites.  
85 To obtain representative transcriptional information from *Plasmodium* parasites, it is therefore  
86 valuable to utilize a system of natural host animals.

87

88 Alas, almost nothing is known about underlying molecular mechanisms in malaria parasites of hosts  
89 other than mice and primates. Which genes are conserved across *Plasmodium* and how do virulence,  
90 immune evasion, and host-specificity vary in species infecting non-mammalian animals? In order to  
91 investigate these questions, it will be necessary to assemble and characterize genome-wide expression  
92 information from malaria parasites throughout their phylogenetic host range. With the recent  
93 development of high-throughput sequencing techniques, it has now become possible to generate  
94 genomic sequences of non-model parasites (Martinsen and Perkins, 2013). Dual RNA-sequencing of  
95 both host and parasite opens up fantastic possibilities of simultaneously studying host-parasite  
96 interactions and describing transcriptome expression in both actors. Great care must be taken,  
97 however, when assembling parasite sequences *de novo*. Transcripts from the host and/or other sources  
98 of contamination may remain even after annotation and blast searches have taken place. Meticulous

99 filtering of assemblies using bioinformatics is therefore crucial to avoid erroneous conclusions (see  
100 e.g. Koutsovoulos et al. 2016). After constructing filtered high-quality parasite transcriptome data, we  
101 can start to investigate the aforementioned questions about *Plasmodium*.

102

103 In this study, we sequenced and assembled the blood transcriptome of the avian malaria parasite  
104 *Plasmodium ashfordi*. Malaria parasites infecting birds are highly suitable for studying transcriptional  
105 parasite responses due to their enormous diversity and large variation in host specificity and virulence  
106 (Bensch et al., 2004; Križanauskienė et al., 2006; Lachish et al., 2011). Some avian *Plasmodium* are  
107 extreme host generalists, successfully infecting birds over several orders, while other parasites are  
108 host specialists infecting one species (Drovetski et al., 2014; Pérez-Tris et al., 2007). The avian  
109 malaria system allows for the possibility of capturing wild birds in a natural setting, and evaluate their  
110 status of malaria infection. Additionally, infection experiments have in the last couple of years  
111 showed great potential to study *Plasmodium* in passerines under controlled conditions in laboratories  
112 (Cornet et al., 2014; Dimitrov et al., 2015; Ellis et al., 2015; Palinauskas et al., 2008, 2011;  
113 Zehtindjiev et al., 2008). We used our assembly of *P. ashfordi* to evaluate transcriptome  
114 characteristics, genome-wide sequence similarity, and investigate genes known to be involved in the  
115 *Plasmodium* red blood cell invasion process. We analyzed expression levels of parasite genes in three  
116 experimentally infected birds during both peak and decreasing parasitemia, two infection stages where  
117 the hosts exhibit different transcriptome responses (Videvall et al., 2015). This allowed us for the first  
118 time to follow and describe the dynamic transcriptome of an avian malaria parasite over time in  
119 individual hosts.

120

121

122

## 123 **Results**

124

### 125 **The *Plasmodium ashfordi* transcriptome assembly**

126 We sequenced blood collected from three experimentally infected Eurasian siskins (*Carduelis spinus*)  
127 during peak and decreasing parasitemia levels with Illumina dual RNA-sequencing (see Methods for  
128 details). The transcriptome of *P. ashfordi* was assembled into two versions in order to make it  
129 transparent and as useful as possible for other researchers. The first assembly version, which we refer  
130 to as the annotated assembly, contains the transcripts with annotation information from apicomplexa  
131 proteins (n = 7 860) (Figure 1; Supplementary Table S1). The second version that we refer to as the  
132 total assembly, contains the unannotated contigs (n = 4 094) that were strictly filtered to remove  
133 contigs from the avian host (Figure 1) together with the annotated contigs, resulting in a total of 11  
134 954 representative transcripts (Table 1).

135 The size of the total transcriptome assembly is 9.0 Mbp and the annotated version of the  
136 assembly comprise 7.3 Mbp (81.20%) (Table 1). We calculated assembly statistics using the  
137 transcriptome-specific measurement E90N50, which represents the contig N50 value based on the set  
138 of transcripts representing 90% of the expression data, and is preferable over the original N50  
139 measurement when evaluating transcriptome assemblies (Haas, 2016). The assembly E90N50 is 1 988  
140 bp and the mean transcript length of the annotated transcripts is 930.8 bp (Table 1, Supplementary  
141 Figure S1). In comparison, the length of coding sequences in the *Haemoproteus tartakovskiyi* (sister  
142 parasite to *Plasmodium*) genome is mean = 1 206 and median = 1 809 bp (Bensch et al., 2016). The *P.*  
143 *falciparum* transcriptome contains transcripts of median length 1 320 and mean length 2 197 bp  
144 (Gardner et al., 2002). The longest contig in the *P. ashfordi* assembly, consisting of 26 773 bp, is  
145 transcribed from the extremely long ubiquitin transferase gene (AK88\_05171), which has a transcript  
146 length around 27 400 bp in other *Plasmodium* species. The annotated transcriptome has an  
147 exceptionally low mean GC content of 21.22% (Figure 1B), which is even lower than the already GC-  
148 biased transcriptome of *P. falciparum* (23.80%).

149

### 150 **Biological functions of genes expressed in *P. ashfordi***

151 To evaluate biological and molecular functions of all expressed transcripts in *P. ashfordi*, we analysed  
152 gene ontology annotation. Genes were found to primarily belong to the two major molecular groups:  
153 binding and catalytic activity, as well as the biological functions: metabolic and cellular processes  
154 (Supplementary Figure S5). To further investigate the metabolic processes of *P. ashfordi* in detail, a  
155 subsequent analysis of metabolic pathway enrichment compared to *P. falciparum* yielded 19  
156 significant pathways after correcting for multiple testing with the Benjamini and Hochberg false  
157 discovery rate (q-value < 0.1). Glycolysis, purine metabolism, and methane metabolism were among  
158 the top significant metabolic pathways (Figure 2). An investigation of annotated genes belonging to  
159 the gene ontology category “kinase activity” resulted in a total of 95 genes (Supplementary Table S2).

160

### 161 **Gene expression is similar across different stages of infection**

162 The *P. ashfordi* transcripts were next analyzed for expression levels within individual hosts across the  
163 two parasitemia stages. We accounted for differences in parasitemia levels between hosts and time  
164 points, and any variation in sequencing depth between samples, by normalizing overall expression

165 values according to the DESeq method (Anders and Huber, 2010). We found that the parasites  
166 displayed very similar gene expression patterns during peak and decreasing parasitemia stages (Figure  
167 3). No genes were significantly differentially expressed between the time points ( $q$ -value  $> 0.99$ ), and  
168 the correlation in gene expression was extremely high (Pearson's product-moment correlation =  
169 0.9983,  $t = 1\ 905.2$ ,  $df = 11\ 952$ ,  $p$ -value  $< 2.2e-16$ ) (Figure 3A; Supplementary Table S3). Annotated  
170 transcripts showing the highest expression fold change (non-significantly) between the two  
171 parasitemia stages were derived from the following genes (in order of most observed change): rho-  
172 GTPase-activating protein 1, 40S ribosomal protein S3a, two uncharacterized proteins, TATA-box-  
173 binding protein, heat shock protein 90, and C50 peptidase (Supplementary Table S1, Supplementary  
174 Figure S2).

175

### 176 **Gene expression is host-specific**

177 In contrast to the similarities in gene expression between parasitemia stages, the parasite  
178 transcriptomes showed much larger differences in expression levels between the different host  
179 individuals. A principal component analysis of expression variances clustered parasite samples  
180 together within their respective hosts, which showed major similarities in expression profiles (Figure  
181 3C). Samples derived from the same host individual did not separate until the third (15% variance)  
182 and fourth (13% variance) principal component dimensions (Figure 3D). The parasite transcriptome  
183 from host 4 during decreasing parasitemia showed the largest variation in parasite gene expression  
184 among all samples, yet it was still most similar to the transcriptome from the same host during peak  
185 parasitemia (Figure 3B; Figure 3C). In fact, all parasite transcriptomes during the decreasing  
186 parasitemia stage demonstrated closest distance to the transcriptome sample within the same host ten  
187 days earlier (Figure 3B).

188 To further evaluate if specific transcripts contributed to differences in parasite gene  
189 expression levels between individual hosts, we performed a likelihood ratio test over all host  
190 individuals while controlling for parasitemia stage. This resulted in 28 significant *P. ashfordi*  
191 transcripts ( $q$ -value  $< 0.1$ ) displaying very high expression variation between hosts (Figure 4;  
192 Supplementary Table S4). The most significant transcripts were derived from the genes (in order of  
193 most significance) cytochrome c oxidase subunit 1, 70 kd heat shock-like protein, M1 family  
194 aminopeptidase, and metabolite/drug transporter (Supplementary Table S4).

195

### 196 **Transcriptome sequence similarities to other apicomplexan parasites**

197 Almost all annotated contigs (99.59%;  $n = 7\ 828$ ) resulted in a best blast hit against a species within  
198 the genus *Plasmodium* (Figure 5A). The remaining contigs had matches against species within the  
199 genera of *Eimeria* ( $n = 12$ ), *Cryptosporidium* ( $n = 6$ ), *Neospora* ( $n = 5$ ), *Babesia* ( $n = 4$ ), *Hammondia*  
200 ( $n = 2$ ), *Ascogregarina* ( $n = 1$ ), *Theileria* ( $n = 1$ ), and *Toxoplasma* ( $n = 1$ ) (Supplementary Table S5).  
201 The great majority (73.59%) of the contig blast matches were proteins originating from primate  
202 parasites, while 25.34% matched rodent parasites, and only 0.92% parasites of birds (Figure 5B).

203 At the species level, most contigs (29.91%) resulted in best blast hit against *P. falciparum*,  
204 followed by *P. reichenowi* (16.88%) and *P. yoelii* (8.59%) (Figure 5C). The significant blast matches  
205 to bird parasites consisted of the species *Plasmodium gallinaceum* ( $n = 56$ ), *Eimeria acervulina* ( $n =$   
206 5), *Eimeria tenella* ( $n = 4$ ), *Eimeria mitis* ( $n = 3$ ), *Plasmodium relictum* ( $n = 3$ ), and *Plasmodium lutzi*



207 (n = 1). The contigs giving matches to avian *Plasmodium* were primarily derived from commonly  
208 sequenced apicomplexa genes and therefore available in public databases, for example cytochrome c  
209 oxidase subunit 1 (COX1; *P. lutzi*), merozoite surface protein 1 (MSP1; *P. relictum*), thrombospondin  
210 related anonymous protein (TRAP; *P. relictum*), and cytochrome b (CYTB; *P. gallinaceum*)  
211 (Supplementary Table S1).

212 The five contigs with highest GC content in the *P. ashfordi* transcriptome (47.7% – 56.4%)  
213 all had matches against the avian parasites *Eimeria*, despite them only comprising 0.15% (n = 12) of  
214 the total annotation. *Eimeria* spp. have a very high transcriptome GC content (*E. acervulina*: 55.98%;  
215 *E. mitis*: 57.30%), and the *P. ashfordi* transcripts matching this genus consist mostly of ribosomal and  
216 transporter genes (Supplementary Table S1).

217 The *P. ashfordi* contigs with highest expression levels were primarily annotated by  
218 uncharacterized protein matches to the rodent parasite *P. yoelii* (Table 2). In fact, the six most highly  
219 expressed transcripts that were annotated, all gave significant blast matches to *P. yoelii*. Further  
220 investigation revealed that these transcripts are most likely derived from ribosomal RNA.

221

## 222 **Identification of conserved *Plasmodium* invasion genes**

223 Finally, to assess molecularly conserved strategies in *P. ashfordi* compared to mammalian malaria  
224 parasites, we searched for annotated genes known to be involved in the red blood cell invasion by  
225 *Plasmodium* spp. (Beeson et al., 2016; Bozdech et al., 2003). We discovered successfully assembled  
226 *P. ashfordi* transcripts from a whole suite of host cell invasion genes (Table 3). This includes for  
227 example the genes merozoite surface protein 1 (MSP1), apical membrane antigen 1 (AMA1),  
228 merozoite adhesive erythrocytic binding protein (MAEBL), GPI-anchored micronemal antigen  
229 (GAMA), and the rhoptry neck binding proteins 2, 4, and 5 (RON2, RON4, and RON5). Interestingly,  
230 the *P. ashfordi* RON genes in particular seemed to slightly decrease expression levels in all hosts over  
231 the two time points (Figure 6). In general, however, the invasion genes showed a range of expression  
232 patterns over time, going in various directions (Figure 6).

233 All genes known to be involved in the *Plasmodium* motor complex (Baum et al., 2006; Opitz  
234 and Soldati, 2002), driving parasite gliding motion and enabling host cell invasion, were discovered in  
235 *P. ashfordi*. These include: actin (ACT1), actin-like protein (ALP1), aldolase (FBPA), myosin A  
236 (MyoA), myosin A tail interacting protein (MTIP), glideosome-associated protein 45 and 50 (GAP45  
237 and GAP50), and thrombospondin related anonymous protein (TRAP). We also found the  
238 bromodomain protein 1 (BDP1), which has been directly linked to erythrocyte invasion by binding to  
239 chromatin at transcriptional start sites of invasion-related genes and controlling their expression  
240 (Josling et al., 2015).

241 We found two transcripts matching the low molecular weight rhoptry-associated proteins 1  
242 and 3 (RAP1 and RAP3) that are secreted from the rhoptry organelles during cell invasion. The  
243 genomes of human malaria parasites contain a paralog gene called RAP2 as well, whereas rodent  
244 malaria parasites contain a single gene copy that is a chimera of RAP2 and RAP3 (RAP2/3)  
245 (Counihan et al., 2013). The *P. ashfordi* transcript in question (TR13305|c0\_g1\_i1) matches *P.*  
246 *falciparum* RAP3 better than the rodent parasite version of RAP2/3. The three high molecular weight  
247 rhoptry proteins (RhopH1, RhopH2, RhopH3) which bind to the erythrocyte plasma membrane and  
248 transfer to the parasitophorous vacuole membrane upon invasion (Counihan et al., 2013; Vincensini et

249 al., 2008) were all identified in *P. ashfordi*. RhopH1 encompasses the multigene family of  
250 cytoadherence linked asexual proteins (CLAGs), present in varying copy number across *Plasmodium*.

251 Other assembled *P. ashfordi* orthologs of genes involved in host cell invasion were the  
252 rhoptry-associated leucine zipper-like protein 1 (RALP1), rhoptry-associated membrane antigen  
253 (RAMA), armadillo-domain containing rhoptry protein (ARO), RH5 interacting protein (RIPR),  
254 TRAP-like protein (TLP), merozoite TRAP-like protein (MTRAP), thrombospondin related apical  
255 membrane protein (TRAMP), subtilisin proteases 1 and 2, (SUB1 and SUB2), and merozoite surface  
256 proteins 8 and 9 (MSP8 and MSP9). MTRAP and TRAMP are proteins that belong to the TRAP-  
257 family and are released from the microneme organelles during invasion (Cowman et al., 2012; Green  
258 et al., 2006), and the subtilisin proteases SUB1 and SUB2 are heavily involved in the processing and  
259 cleavage of immature merozoite antigens, for example MSP1 and AMA1 (Beeson et al., 2016). ARO  
260 plays a crucial role in positioning the rhoptry organelles within the apical end of the parasite to enable  
261 the release of rhoptry-associated molecules (Mueller et al., 2013) such as RAMA and RALP1, which  
262 then bind to the erythrocyte surface.

263 We furthermore discovered transcripts of several reticulocyte binding proteins (RBP / RH)  
264 thought to be absent in the genomes of avian malaria parasites (Lauron et al., 2015). These particular  
265 transcripts, together with RAMA, interestingly showed much higher e-values than other invasion  
266 genes (Table 3), indicating high differentiation between avian and mammalian *Plasmodium* RH  
267 genes. Finally, two rhomboid proteases (ROM1 and ROM4) have been linked to host cell invasion in  
268 *P. falciparum* via cleavage of transmembrane adhesins (Baker et al., 2006; Santos et al., 2012). We  
269 found both of these genes, together with other rhomboid proteases (ROM2, ROM3, ROM6, ROM8,  
270 and ROM10) expressed in *P. ashfordi*. More information about the assembled genes can be found in  
271 Supplementary Table S1.

272

273



## 274 **Discussion**

275

276 Generating and describing genome-wide expression data of parasites from phylogenetically diverse  
277 hosts is crucial to better understand the evolution of host-parasite interactions, virulence, and host-  
278 specificity. In this study, we assembled and characterized the first transcriptome with quantified gene  
279 expression of an avian malaria parasite, *P. ashfordi*. By developing a bioinformatic pipeline capable  
280 of dealing with dual RNA-seq data, we successfully filtered away contigs originating from the host  
281 and other sources of contamination in a multistep approach. This resulted in a transcriptome with  
282 7 860 annotated transcripts, and an additional 4 094 species-specific unannotated transcripts. Parasite  
283 gene expression displayed strikingly similar patterns during two infection stages and within individual  
284 hosts. Furthermore, *P. ashfordi* shows large similarities to the human malaria parasite, *P. falciparum*,  
285 and the assembly supports several important erythrocyte invasion genes (Table 3) indicating  
286 evolutionary conserved invasion strategies across the phylogenetic host range of *Plasmodium*  
287 parasites.

288

### 289 ***P. ashfordi* displays host-specific gene expression**

290 Interestingly, and contrary to our expectations, *P. ashfordi* showed exceptionally similar expression  
291 profiles inside the same host, despite being sampled ten days apart during two different disease stages.  
292 All birds were inoculated with the same clonal malaria strain, which means the parasite probably  
293 regulates its gene expression levels to fit the different hosts, although direct modulation of parasite  
294 gene expression by the host cannot be excluded. The mechanism behind this host-specific expression  
295 pattern is unknown, but could be due to genotype by genotype interactions between the host and the  
296 parasite, or plasticity of the parasite to varying host environments. This result has potentially  
297 important implications for our understanding of the evolution of host-parasite interactions, and as a  
298 result warrants further research extending the limited sample size to more hosts and more timepoints  
299 throughout the infection.

300 Host genotype by parasite genotype interactions are not well documented in malaria parasite  
301 systems. Studies with different genotypes of both host and parasite have found effects of host  
302 genotype, but not parasite genotype, on factors such as host resistance and parasite virulence  
303 (Mackinnon et al., 2002; de Roode et al., 2004; Grech et al., 2006; see also Idaghdour et al., 2012).  
304 Even less is known about the transcriptome responses of malaria parasites to different hosts. Daily et  
305 al. (2007) discovered host-specific distinct transcriptional states of *P. falciparum* in the blood of  
306 Senegalese children, where parasite transcriptomes could be divided into three distinct clusters  
307 associated with either starvation responses and invasion, glycolysis, or oxidative stress and heat shock  
308 pathways (Daily et al., 2007).

309 The expression profiles of *P. ashfordi* did not exhibit any significant differences between  
310 peak and decreasing parasitemia stages (day 21 and 31 postinfection). The hosts in our study  
311 experienced relatively high parasitemia levels also during the decreasing parasitemia stage (see  
312 Methods), so it is possible that these specific time points do not provide very different environmental  
313 host cues to the parasites. However, the simultaneous transcriptomes of the avian hosts (analyzed in  
314 Videvall et al. 2015) displayed large differences in gene expression between these two parasitemia  
315 stages, notably with a reduced immune response during decreasing parasitemia. This is important

316 because it appears that *P. ashfordi* does not adjust its gene expression in response to the decreasing  
317 immune levels of the hosts, but instead conforms to the specific environment of individual hosts.

318 *P. falciparum* evades the human immune defense via intracellularly, clonal antigenic  
319 variation (Guizetti and Scherf, 2013), transcriptional antigenic switches (Recker et al., 2011), splenic  
320 avoidance by erythrocytic adherence to the endothelium (Craig and Scherf, 2001) and sequestration in  
321 organ microvasculature (Ashley et al., 2014), erythrocytic rosetting (Niang et al., 2014), host  
322 immunosuppression (Hisaeda et al., 2004), and manipulation of host gene expression. It is possible  
323 that *P. ashfordi* shares several of these evasion strategies with *P. falciparum*, although this remains  
324 unknown. One example of immune evasion by manipulation of host gene expression is the parasite  
325 gene macrophage migration inhibitory factor homologue (MIF), which contributes to *Plasmodium*  
326 parasites' ability to modulate the host immune response by molecular mimicry (Cordery et al., 2007).  
327 This gene was discovered transcribed in *P. ashfordi* as well (TR2046|c0\_g1\_i1), suggesting a similar  
328 immune manipulation strategy.

329

### 330 **Similarities to *P. falciparum* and other malaria parasites**

331 The majority of all annotated contigs (73.59%) resulted in a best blast hit against primate parasite  
332 species (Figure 5A). Curiously, the human malaria parasite *P. falciparum* comprised the majority of  
333 all matches with almost a third of the transcripts (29.91%) (Figure 5C). This is likely because *P.*  
334 *falciparum* currently constitutes the organism with most sequence similarities to *P. ashfordi* based on  
335 publically available sequences (Bensch et al., 2016). The chimpanzee parasite *P. reichenowi* had the  
336 second most blast matches to *P. ashfordi* (Figure 5C), and it is the closest living relative of *P.*  
337 *falciparum* as far as we know (Otto et al., 2014). Furthermore, both parasites share the genome  
338 characteristics of being extremely AT-biased, with *P. ashfordi* reaching a remarkably low  
339 transcriptomic GC content of 21.22% (Table 1) compared to the already extremely AT-rich *P.*  
340 *falciparum*, which has a transcriptomic GC content of 23.80%. Lastly, because of its role in human  
341 disease, *P. falciparum* is the most sequenced *Plasmodium* species (172 official strains in the NCBI  
342 taxonomy database as of May 2016) (Gardner et al., 2002), resulting in plenty of opportunities for  
343 transcript sequences to find significant blast matches.

344 Less than one percent of all contigs resulted in a blast hit against avian parasites (0.92%).  
345 This is due to the fact that almost no genomic resources are available for avian *Plasmodium*. Despite  
346 their enormous diversity, world-wide distribution, and harmful effects on susceptible bird populations,  
347 genomic studies of avian malaria parasites have been largely non-existent until now. The genome of  
348 *P. gallinaceum*, the malaria parasite of chickens, has been sequenced but not published and is not yet  
349 available (Ulrike Boehme, personal communication). A transcriptome assembly of *P. gallinaceum* is  
350 available for download (Lauron et al., 2014, 2015), although still contains a large proportion of  
351 contigs with significant blast matches to birds, making comparisons with *P. ashfordi* difficult  
352 (Supplementary Figure S4). Dual RNA-sequencing of a more distantly related apicomplexan parasite,  
353 *Leucocytozoon buteonis*, and its buzzard host was recently described (Pauli et al., 2015), though no  
354 publically available transcriptome exists. Finally, 454 RNA-sequencing of the generalist avian malaria  
355 parasite *P. relictum* (lineage SGS1) has been previously performed (Bensch et al., 2014; Hellgren et  
356 al., 2013), but the low sequencing coverage does not allow for assembly nor any transcriptome

357 analyses. We hope that future versions of these avian parasite transcriptomes will enable genome-  
358 wide comparisons.

359 The lack of genome-wide sequence data from malaria parasites of hosts other than mice and  
360 primates, means that little is known about which genes across *Plasmodium* are conserved and which  
361 are unique. As a first step to investigate this, we searched in the *P. ashfordi* assembly for genes known  
362 to be involved in the merozoite invasion of host red blood cells. This particular group of genes has  
363 shown the greatest diversity in mammalian *Plasmodium* and many are under strong positive selection  
364 due to their role in host specificity (Hall et al., 2005; Otto et al., 2014). Previously, only a handful of  
365 studies have sequenced candidate invasion genes in avian malaria parasites; these include MAEBL  
366 (Martinez et al., 2013), AMA1 and RON2 (Lauron et al., 2014), MSP1 (Hellgren et al., 2013, 2015),  
367 RIPP (Lauron et al., 2015), and TRAP (Farias et al., 2012; Templeton and Kaslow, 1997). Due to the  
368 evolutionary distance between mammals and saurians, and their inherent blood cell differences  
369 (birds/reptiles have erythrocytes with a nucleus and mitochondria while mammalian cells are  
370 anucleated), we might expect to find few and highly differentiated gene orthologs. Remarkably, we  
371 discovered a large number of red blood cell invasion genes expressed in *P. ashfordi* (Table 3),  
372 indicating that most of these specific invasion genes are conserved across both mammalian and avian  
373 *Plasmodium*.

374 The invasion genes that were most differentiated between birds and mammals were the  
375 rhoptry-associated membrane antigen (RAMA) and the reticulocyte binding proteins (RBP/RH),  
376 which had diverged almost beyond recognition. These RH genes, together with other erythrocyte  
377 binding antigens (EBA), are missing in *P. vivax*, and have understandably been assumed absent in the  
378 genomes of avian malaria parasites (Lauron et al., 2015). However, our result suggests that several are  
379 not only present, but also transcribed, though with high sequence divergence. It is possible that  
380 additional erythrocyte binding proteins are present in the *P. ashfordi* assembly, though ortholog  
381 searches for these genes will become complicated if they have evolved under especially strong  
382 selection pressure in avian *Plasmodium*. Genes that are orthologous between *P. falciparum* and avian  
383 malaria parasites but absent from other mammalian parasites are important genomic markers of  
384 maintained ancestral states (Bensch et al., 2016). We can therefore advance our understanding about  
385 the evolution of *Plasmodium* species by analyzing genomes and transcriptomes of avian malaria  
386 parasites.

387

388

## 389 **Conclusion**

390 In this study we have sequenced, assembled, and characterized the transcriptome of *Plasmodium*  
391 *ashfordi*. The results presented here and the associated assembly will help improve our understanding  
392 of host-parasite interactions, evolutionary conserved *Plasmodium* strategies, and the phylogenetic  
393 relationships between apicomplexans. In addition, we have shown that *P. ashfordi* displays strikingly  
394 similar expression profiles within individual hosts during two different stages of the infection – but  
395 different expression patterns between individual hosts – indicating host specific parasite gene  
396 regulation. The expression information of all transcripts in the *P. ashfordi* transcriptome will  
397 ultimately assist researchers studying genes involved in e.g. immune evasion, host-specificity, and  
398 parasite plasticity.

399

400

## 401 **Methods**

402

### 403 **Experimental setup**

404 We used four wild-caught juvenile Eurasian siskins (*Carduelis spinus*) in an infection experiment.

405 The procedure was carried out 2012 at the Biological Station of the Zoological Institute of the Russian  
406 Academy of Sciences on the Curonian Spit in the Baltic Sea. All details regarding the experimental  
407 setup have been outlined in Videvall et al. (2015). Briefly, three of the birds were inoculated with a  
408 single injection of blood containing the erythrocytic stages of *Plasmodium ashfordi*, subgenus  
409 *Novyella*, lineage GRW2. For a description of this parasite, see Valkiūnas et al. (2007). A control bird  
410 (bird 1) was simultaneously inoculated with uninfected blood for the evaluation of host transcription  
411 (Videvall et al., 2015). Blood samples for RNA-sequencing were taken from birds before infection  
412 (day 0), during peak parasitemia (day 21 postinfection) and during the decreasing parasitemia stage  
413 (day 31 postinfection).

414 All birds were thoroughly screened with both microscopic (Palinauskas et al., 2008) and  
415 molecular (Hellgren et al., 2004) methods before the experiment to make sure they had no prior  
416 haemosporidian infection. The parasitemia intensity varied substantially in infected birds, with bird 2,  
417 bird 3, and bird 4 having 24.0%, 48.0%, and 71.3% of their red blood cells infected during peak  
418 parasitemia, and later 8.2%, 21.8%, and 33.3%, respectively, during the decreasing parasitemia stage  
419 (Videvall et al., 2015). The two parasitemia stages are sometimes referred to as different ‘infection  
420 stages’ in the hosts, but we like to clarify that there is no evidence present suggesting that the parasites  
421 have entered a different stage of their life cycle (e.g. tissue merogony). Experimental procedures were  
422 approved by the International Research Co-operation Agreement between the Biological Station  
423 Rybachy of the Zoological Institute of the Russian Academy of Sciences and Institute of Ecology of  
424 Nature Research Centre (25 May 2010). Substantial efforts were made to minimize handling time and  
425 potential suffering of birds.

426

### 427 **RNA extraction and sequencing**

428 From six infected samples (three treatment birds at days 21 and 31) and six uninfected samples (three  
429 treatment birds at day 0 and one control bird at days 0, 21, and 31) total RNA was extracted from 20  
430  $\mu$ l whole blood. Detailed extraction procedures can be found in Videvall et al. (2015). Total extracted  
431 RNA was sent to Beijing Genomics Institute (BGI), China, for RNA quality control, DNase  
432 treatment, rRNA depletion, and amplification using the SMARTer Ultra Low kit (Clontech  
433 Laboratories, Inc.). BGI performed library preparation, cDNA synthesis, and paired-end RNA-  
434 sequencing using Illumina HiSeq 2000. The blood samples from bird 3 and bird 4 during peak  
435 parasitemia were sequenced by BGI an additional time in order to generate more reads from the  
436 parasite in preparation for this transcriptome assembly. These resequenced samples were regarded and  
437 handled as technical replicates. We quality-screened all the demultiplexed RNA-seq reads using  
438 FastQC (v. 0.10.1) (<http://www.bioinformatics.babraham.ac.uk/projects/fastqc/>).

439

### 440 **De novo transcriptome assembly**

441 Quality-filtered RNA-seq reads from all six infected bird samples together with the two re-sequenced  
442 samples were used in a *de novo* assembly. This was performed using the transcriptome assembler

443 Trinity (v. 2.0.6) (Grabherr et al., 2011) with 489 million reads. Mapping of reads to available  
444 genomes of human malaria parasites were employed simultaneously, but unfortunately these attempts  
445 yielded few hits due to the evolutionary distance between avian *Plasmodium* and human *Plasmodium*,  
446 so we continued annotating the assembly using blast searches.

447 The assembled transcripts were blasted against the NCBI non-redundant protein database  
448 using the program DIAMOND BLASTX (v. 0.7.9) (Altschul et al., 1990; Buchfink et al., 2014) with  
449 sensitive alignment mode. A total of 47 823 contigs generated significant hits against avian species  
450 (Figure 1C). A large number of contigs (n = 260 162) did not produce any significant (e-value < 1e-5)  
451 blastx hits (Figure 1D). This is because 1) the host species is a non-model organism without a genome  
452 available, leading to a large number of host contigs without blast hits, 2) multiple contigs do not  
453 necessarily contain coding sequences, but can be derived from noncoding RNAs, etc. and therefore  
454 will not match protein sequences, 3) short, fragmented contigs may not yield sufficient blast hit  
455 significance, and 4) an extreme underrepresentation of protein sequences from avian *Plasmodium*  
456 species in the NCBI nr database will not result in any significant blast hits to genes unique in avian  
457 malaria parasites.

458 We strictly filtered the initial assembly by only retaining a total of 9 015 transcripts  
459 (isoforms) that produced significant blast matches against proteins from species in the Apicomplexa  
460 phylum. A previous assembly using an earlier version of Trinity (v. r20140413p1) (Grabherr et al.,  
461 2011) performed better when it came to assembling the longest contigs (> 6 kbp). Different versions  
462 of assembler software may construct de Bruijn graphs somewhat differently, which is why it can be a  
463 good idea to make several assemblies and later combine parts of them (Brian Haas, personal  
464 communication). The previous assembly had been blasted and screened for apicomplexa in the same  
465 way as described above. In order not to lose these important full-length transcripts, we therefore  
466 included the longest contigs from the previous assembly that had 1) not assembled correctly in the  
467 current assembly, and 2) significant blastx hits against apicomplexa (n = 10), resulting in a total of 9  
468 025 transcripts. The fact that these contigs contained similar sequences already present in the  
469 assembly was dealt with through downstream clustering of the sequences.

470

#### 471 **Transcriptome cleaning and filtering**

472 Some contigs in the annotated assembly contained poly-A tails which complicated downstream  
473 analyses and resulted in biased mapping estimates. We therefore removed all poly-A/T tails using  
474 PRINSEQ (v. 0.20.4) (Schmieder and Edwards, 2011) with a minimum prerequisite of 12 continuous  
475 A's or T's in the 5' or 3' end of the contigs. A total of 106 202 bases (1.18%) was trimmed and the  
476 mean transcript length was reduced from 995.28 to 983.52 bases.

477 The unknown transcripts that failed to produce significant hits to any organism during the  
478 blastx run (n = 260 162) were subsequently cleaned using the following procedure. First, we trimmed  
479 them for poly-A tails, resulting in a total of 455 331 bases removed, and a slight decrease of the mean  
480 length of the unknown sequences from 555.27 nt before trimming to 553.52 nt after trimming. The  
481 majority of these unknown transcripts came from host mRNA, but their GC content displayed a clear  
482 bimodal distribution (Figure 1D), where the contigs with very low GC were strongly suspected to  
483 originate from the parasite. To avoid any host contigs, we strictly filtered the unknown transcripts to  
484 only include sequences with a mean GC content lower than 23% (n = 4 624). This threshold was



485 based on the apicomplexa-matching transcripts which had a mean GC content of 21.22%, and all  
486 poly-A trimmed contigs giving significant blast matches to birds (class: Aves) (n = 47 823), where the  
487 mean GC content was 47.65%, and the avian contig with the absolute lowest GC content had 23.48%  
488 GC (Figure 1C).

489

#### 490 **Transcriptome clustering, further filtering, and validation**

491 To reduce redundancy of multiple isoforms and transcripts derived from the same gene, we first  
492 merged together the annotated and the unknown transcripts with a GC content < 23% (n = 13 649).  
493 We then clustered these sequences together in order to retain most transcripts but group the highly  
494 similar ones based on 97% sequence similarity and a k-mer size of 10, using CD-HIT-EST (v. 4.6) (Li  
495 and Godzik, 2006). The most representative (longest) contig in every cluster was selected to represent  
496 those transcripts, resulting in 12 266 contigs/clusters. We further filtered all the short sequences (<  
497 200 bases), to obtain a set of 12 182 representative transcripts.

498 A second blast filtering step with the trimmed representative contigs against the Refseq  
499 genomic database was then employed using BLASTN+ (v. 2.2.29) (Altschul et al., 1990; Camacho et  
500 al., 2009) to identify some ambiguous contigs suspected to contain non-coding RNA bird sequences.  
501 We removed all contigs that gave significant matches (e-value: 1e-6) against all animals (kingdom  
502 Metazoa), so we could be confident that the assembly only consisted of true parasite transcripts. This  
503 last filtering step removed 228 contigs.

504 The unannotated transcripts (n = 4 094) of the final assembly were further validated to  
505 originate from the parasite by using reads from the six uninfected samples of the same hosts sampled  
506 before infection and the control bird. A total of 350 318 482 reads (65 bp and 90 bp) from all  
507 uninfected samples were mapped to the unannotated transcripts using Bowtie2 (v. 2.2.5) (Langmead  
508 and Salzberg, 2012), resulting in the alignment of 90 read pairs (0.000051%). This extremely low  
509 mapping percentage from the uninfected samples greatly supported our conclusion that these  
510 transcripts had indeed been transcribed by *P. ashfordi*. These 4 094 representative transcripts with  
511 unknown function are referred to throughout the paper as unannotated transcripts.

512 The resulting final transcriptome assembly consists of 11 954 representative annotated and  
513 unannotated transcripts. The genomes of *Plasmodium* parasites generally contain around 5-6 000  
514 protein-coding genes (Kersey et al., 2015), making it reasonable to assume similar gene numbers for  
515 the *P. ashfordi* genome. The larger number of transcripts in the assembly is therefore a result of  
516 isoform varieties and fragmented contigs.

517

#### 518 **Estimating expression levels**

519 Poly-A tails of 489 million RNA-seq reads from all samples were trimmed as well using PRINSEQ  
520 (v. 0.20.4) (Schmieder and Edwards, 2011). A minimum prerequisite for trimming were 20  
521 continuous A's or T's in the 5' or 3' end of each read. Only trimmed reads longer than 40 bp and still  
522 in a pair were retained (n = 451 684 626) in order to confidently map high quality reads with good  
523 minimum lengths. Bowtie2 (v. 2.2.5) (Langmead and Salzberg, 2012) was used to map the trimmed  
524 RNA-seq reads of every sample (n = 8) (six biological and two technical replicates) back to the *P.*  
525 *ashfordi* transcriptome consisting of the 11 954 representative sequences. We calculated expression

526 levels using RSEM (v. 1.2.21) (Li and Dewey, 2011), which produces expected read counts for every  
527 contig.

528 The counts of the 11 954 transcripts were subsequently analyzed inside the R statistical  
529 environment (v. 3.2.5) (R Core Team, 2015). We tested for expression differences in the malaria  
530 parasites between the two time points, peak and decreasing parasitemia, using DESeq2 (v. 1.10.1)  
531 (Love et al., 2014). The two resequenced samples (technical replicates) of bird 3 and bird 4 during  
532 peak parasitemia were handled exactly the same as all other samples, and their respective read count  
533 were added to their biological samples, according to the DESeq2 manual. Individual host was used as  
534 a factor in the analysis, and counts were normalized to account for potential variation in sequencing  
535 depth as well as the large differences in number of parasites present in the blood (parasitemia levels).  
536 Regularized log transformation of counts was performed in order to represent the data without any  
537 prior knowledge of sampling design in the principal component analysis and sample distance  
538 calculations. This way of presenting counts without bias is preferred over variance stabilizing of  
539 counts when normalization size factors varies greatly between the samples, as they naturally do in our  
540 data.

541

#### 542 **Transcriptome evaluation**

543 Transcriptome statistics such as GC content, contig length, and assembled bases were calculated using  
544 bash scripts and in the R statistical environment (v. 3.2.5) (Pages et al., 2015; R Core Team, 2015). P-  
545 values were corrected for multiple testing with the Benjamini and Hochberg false discovery rate  
546 (Benjamini and Hochberg, 1995) and corrected values have been labeled as q-values throughout. We  
547 calculated the GC content of two *Eimeria* transcriptomes downloaded from ToxoDB (v. 25) (Gajria et  
548 al., 2007), initially sequenced by Reid et al. (2014). Transcriptome E90N50 was calculated using  
549 RSEM (v. 1.2.21) and Trinity (v. 2.0.6) (Grabherr et al., 2011; Haas, 2016; Li and Dewey, 2011).  
550 Plots were made with the R package ggplot2 (v. 2.1.0) (Wickham, 2009). Metabolic pathway and  
551 gene ontology enrichment analyses were conducted in PlasmoDB (Aurrecochea et al., 2009) using  
552 orthologs of annotated gene names to compare against the gene ontology and metabolic pathway  
553 background information from *P. falciparum* 3D7. The red blood cell invasion genes were searched for  
554 in the transcriptome annotation of *P. ashfordi* (Supplementary Table S1). Only genes with  
555 documented involvement in *Plasmodium* erythrocyte invasion were included.

556

#### 557 **Data availability**

558 The sequence reads of both host and parasite have been deposited at the NCBI Sequence Read  
559 Archive under the accession number PRJNA311546. The assembled *P. ashfordi* transcripts are  
560 available for download at <http://mbio-serv2.mbioekol.lu.se/Malavi/Downloads>.

561

562

## 563 **Author Contributions**

564

565 The study design was initially conceived by OH, VP and GV, and further developed together with EV  
566 and CKC. VP performed the experiments. OH performed the RNA extractions. Assembly and  
567 bioinformatic and statistical analyses were performed by EV. DA advised in the trimming step of the  
568 assembly and in the mapping of sequence reads. OH, CKC, and EV planned the paper. EV drafted the  
569 paper with extensive input from all authors.

570

571

## 572 **Funding**

573

574 This work was supported by the Swedish Research Council (grant 621-2011-3548 to OH and 2010-  
575 5641 to CKC), the Crafoord Foundation (grant 20120630 to OH), European Social Fund under the  
576 global grant measure (grant VPI-3.1.-ŠMM-07-K-01-047 to GV), Research Council of Lithuania  
577 (grant MIP-045/2015 to GV) and a Wallenberg Academy Fellowship to CKC.

578

579

580

## 581 **Acknowledgments**

582

583 We would like to thank Staffan Bensch for stimulating discussions and comments on this paper. We  
584 are also grateful to Brian Haas for advice on transcriptome assemblies, and the director of the  
585 Biological Station “Rybachy”, Casimir V. Bolshakov, for generously providing facilities for the  
586 experimental research. The assembly and blastn computations were performed on resources provided  
587 by SNIC through Uppsala Multidisciplinary Center for Advanced Computational Science (UPPMAX)  
588 (Lampa et al., 2013) under project b2014134; all other computational analyses were performed by EV  
589 on a local machine.

590

591

592

## 593 **References**

594

- 595 Altschul, S. F., Gish, W., Miller, W., Myers, E. W., and Lipman, D. J. (1990). Basic local alignment  
596 search tool. *J. Mol. Biol.* 215, 403–410. doi:10.1016/S0022-2836(05)80360-2.
- 597 Anders, S., and Huber, W. (2010). Differential expression analysis for sequence count data. *Genome*  
598 *Biol.* 11, R106. doi:10.1186/gb-2010-11-10-r106.
- 599 Ashley, E. a., Dhorda, M., Fairhurst, R. M., Amaratunga, C., Lim, P., Suon, S., et al. (2014). Spread  
600 of Artemisinin Resistance in *Plasmodium falciparum* Malaria. *N. Engl. J. Med.* 371, 411–423.  
601 doi:10.1056/NEJMoa1314981.
- 602 Aurrecochea, C., Brestelli, J., Brunk, B. P., Dommer, J., Fischer, S., Gajria, B., et al. (2009).  
603 PlasmoDB: A functional genomic database for malaria parasites. *Nucleic Acids Res.* 37, 539–  
604 543. doi:10.1093/nar/gkn814.
- 605 Baker, R. P., Wijetilaka, R., and Urban, S. (2006). Two *Plasmodium rhomboid* proteases  
606 preferentially cleave different adhesins implicated in all invasive stages of malaria. *PLoS*  
607 *Pathog.* 2, 0922–0932. doi:10.1371/journal.ppat.0020113.
- 608 Baum, J., Richard, D., Healer, J., Rug, M., Krnajski, Z., Gilberger, T. W., et al. (2006). A conserved  
609 molecular motor drives cell invasion and gliding motility across malaria life cycle stages and  
610 other apicomplexan parasites. *J. Biol. Chem.* 281, 5197–5208. doi:10.1074/jbc.M509807200.
- 611 Beeson, J. G., Drew, D. R., Boyle, M. J., Feng, G., Fowkes, F. J. I., and Richards, J. S. (2016).  
612 Merozoite surface proteins in red blood cell invasion, immunity and vaccines against malaria.  
613 *FEMS Microbiol. Rev.*, fuw001. doi:10.1093/femsre/fuw001.
- 614 Benjamini, Y., and Hochberg, Y. (1995). Controlling the False Discovery Rate: a Practical and  
615 Powerful Approach to Multiple Testing. *J. R. Stat. Soc. Ser. B* 57, 289–300.
- 616 Bensch, S., Canbäck, B., DeBarry, J. D., Johansson, T., Hellgren, O., Kissinger, J. C., et al. (2016).  
617 The Genome of *Haemoproteus tartakovskyi* and Its Relationship to Human Malaria Parasites.  
618 *Genome Biol. Evol.* 8, 1361–1373. doi:10.1093/gbe/evw081.
- 619 Bensch, S., Coltman, D. W., Davis, C. S., Hellgren, O., Johansson, T., Malenfant, R. M., et al. (2014).  
620 Genomic Resources Notes accepted 1 June 2013–31 July 2013. *Mol. Ecol. Resour.* 14, 218.  
621 doi:10.1111/1755-0998.12166.
- 622 Bensch, S., Pérez-Tris, J., Waldenström, J., and Hellgren, O. (2004). Linkage between nuclear and  
623 mitochondrial DNA sequences in avian malaria parasites: multiple cases of cryptic speciation?  
624 *Evolution (N. Y.)* 58, 1617–1621. doi:10.1111/j.0014-3820.2004.tb01742.x.
- 625 Bozdech, Z., Llinás, M., Pulliam, B. L., Wong, E. D., Zhu, J., and DeRisi, J. L. (2003). The  
626 transcriptome of the intraerythrocytic developmental cycle of *Plasmodium falciparum*. *PLoS*  
627 *Biol.* 1, E5. doi:10.1371/journal.pbio.0000005.
- 628 Buchfink, B., Xie, C., and Huson, D. H. (2014). Fast and sensitive protein alignment using  
629 DIAMOND. *Nat. Methods* 12, 59–60. doi:10.1038/nmeth.3176.
- 630 Camacho, C., Coulouris, G., Avagyan, V., Ma, N., Papadopoulos, J., Bealer, K., et al. (2009). BLAST  
631 plus: architecture and applications. *BMC Bioinformatics* 10, 1. doi:Artn 421\nDoi 10.1186/1471-  
632 2105-10-421.
- 633 Cordery, D. V., Kishore, U., Kyes, S., Shafi, M. J., Watkins, K. R., Williams, T. N., et al. (2007).  
634 Characterization of a *Plasmodium falciparum* Macrophage-Migration Inhibitory Factor  
635 Homologue. *J. Infect. Dis.* 195, 905–912. doi:10.1086/511309.
- 636 Cornet, S., Bichet, C., Larcombe, S., Faivre, B., and Sorci, G. (2014). Impact of host nutritional status  
637 on infection dynamics and parasite virulence in a bird-malaria system. *J. Anim. Ecol.* 83, 256–  
638 65. doi:10.1111/1365-2656.12113.
- 639 Counihan, N. A., Kalanon, M., Coppel, R. L., and De Koning-Ward, T. F. (2013). *Plasmodium*

- 640 rhoptry proteins: Why order is important. *Trends Parasitol.* 29, 228–236.  
641 doi:10.1016/j.pt.2013.03.003.
- 642 Cowman, A. F., Berry, D., and Baum, J. (2012). The cellular and molecular basis for malaria parasite  
643 invasion of the human red blood cell. *J. Cell Biol.* 198, 961–971. doi:10.1083/jcb.201206112.
- 644 Craig, A., and Scherf, A. (2001). Molecules on the surface of the Plasmodium falciparum infected  
645 erythrocyte and their role in malaria pathogenesis and immune evasion. *Mol. Biochem.*  
646 *Parasitol.* 115, 129–143. doi:10.1016/S0166-6851(01)00275-4.
- 647 Daily, J. P., Le Roch, K. G., Sarr, O., Ndiaye, D., Lukens, A., Zhou, Y., et al. (2005). In vivo  
648 transcriptome of Plasmodium falciparum reveals overexpression of transcripts that encode  
649 surface proteins. *J. Infect. Dis.* 191, 1196–1203. doi:10.1086/428289.
- 650 Daily, J. P., Scanfeld, D., Pochet, N., Le Roch, K., Plouffe, D., Kamal, M., et al. (2007). Distinct  
651 physiological states of Plasmodium falciparum in malaria-infected patients. *Nature* 450, 1091–  
652 1095. doi:10.1038/nature06311.
- 653 Dimitrov, D., Palinauskas, V., Iezhova, T. a, Bernotienė, R., Ilgūnas, M., Bukauskaitė, D., et al.  
654 (2015). Plasmodium spp.: an experimental study on vertebrate host susceptibility to avian  
655 malaria. *Exp. Parasitol.* 148, 1–16. doi:10.1016/j.exppara.2014.11.005.
- 656 Drovetski, S. V., Aghayan, S. A., Mata, V. A., Lopes, R. J., Mode, N. A., Harvey, J. A., et al. (2014).  
657 Does the niche breadth or trade-off hypothesis explain the abundance-occupancy relationship in  
658 avian Haemosporidia? *Mol. Ecol.* 23, 3322–3329. doi:10.1111/mec.12744.
- 659 Ellis, V. A., Cornet, S., Merrill, L., Kunkel, M. R., Tsunekage, T., and Ricklefs, R. E. (2015). Host  
660 immune responses to experimental infection of Plasmodium relictum (lineage SGS1) in  
661 domestic canaries (Serinus canaria). *Parasitol. Res.* 114, 3627–3636. doi:10.1007/s00436-015-  
662 4588-7.
- 663 Farias, M. E. M., Atkinson, C. T., LaPointe, D. A., and Jarvi, S. I. (2012). Analysis of the trap gene  
664 provides evidence for the role of elevation and vector abundance in the genetic diversity of  
665 Plasmodium relictum in Hawaii. *Malar. J.* 11, 1–8. doi:http://dx.doi.org/10.1186/1475-2875-11-  
666 305.
- 667 Gajria, B., Bahl, A., Brestelli, J., Dommer, J., Fischer, S., Gao, X., et al. (2007). ToxoDB: an  
668 integrated Toxoplasma gondii database resource. *Nucleic Acids Res.* 36, D553–D556.  
669 doi:10.1093/nar/gkm981.
- 670 Gardner, M. J., Hall, N., Fung, E., White, O., Berriman, M., Hyman, R. W., et al. (2002). Genome  
671 sequence of the human malaria parasite Plasmodium falciparum. *Nature* 419, 498–511.  
672 doi:10.1038/nature01097.
- 673 Garnham, P. C. C. (1966). *Malaria parasites and other Haemosporidia*. Oxford, UK: Blackwell  
674 Scientific Publications Ltd.
- 675 Grabherr, M. G., Haas, B. J., Yassour, M., Levin, J. Z., Thompson, D. a, Amit, I., et al. (2011). Full-  
676 length transcriptome assembly from RNA-Seq data without a reference genome. *Nat.*  
677 *Biotechnol.* 29, 644–52. doi:10.1038/nbt.1883.
- 678 Grech, K., Watt, K., and Read, A. F. (2006). Host-parasite interactions for virulence and resistance in  
679 a malaria model system. *J. Evol. Biol.* 19, 1620–1630. doi:10.1111/j.1420-9101.2006.01116.x.
- 680 Green, J. L., Hinds, L., Grainger, M., Knuepfer, E., and Holder, A. A. (2006). Plasmodium  
681 thrombospondin related apical merozoite protein (PTRAMP) is shed from the surface of  
682 merozoites by PfSUB2 upon invasion of erythrocytes. *Mol. Biochem. Parasitol.* 150, 114–117.  
683 doi:10.1016/j.molbiopara.2006.06.010.
- 684 Guizetti, J., and Scherf, A. (2013). Silence, activate, poise and switch! Mechanisms of antigenic  
685 variation in Plasmodium falciparum. *Cell. Microbiol.* 15, 718–726. doi:10.1111/cmi.12115.
- 686 Haas, B. (2016). Transcriptome Contig Nx and ExN50 stats. Available at:  
687 <https://github.com/trinityrnaseq/trinityrnaseq/wiki/Transcriptome-Contig-Nx-and-ExN50-stats>



- 688 [Accessed May 4, 2016].
- 689 Hall, N., Karras, M., Raine, J. D., Carlton, J. M., Kooij, T. W. A., Berriman, M., et al. (2005). A  
690 comprehensive survey of the Plasmodium life cycle by genomic, transcriptomic, and proteomic  
691 analyses. *Science* 307, 82–6. doi:10.1126/science.1103717.
- 692 Hellgren, O., Atkinson, C. T., Bensch, S., Albayrak, T., Dimitrov, D., Ewen, J. G., et al. (2015).  
693 Global phylogeography of the avian malaria pathogen Plasmodium relictum based on MSP1  
694 allelic diversity. *Ecography (Cop.)*. 38, 842–850. doi:10.1111/ecog.01158.
- 695 Hellgren, O., Kutzer, M., Bensch, S., Valkiūnas, G., and Palinauskas, V. (2013). Identification and  
696 characterization of the merozoite surface protein 1 (msp1) gene in a host-generalist avian  
697 malaria parasite, Plasmodium relictum (lineages SGS1 and GRW4) with the use of blood  
698 transcriptome. *Malar. J.* 12, 381. doi:10.1186/1475-2875-12-381.
- 699 Hellgren, O., Waldenström, J., and Bensch, S. (2004). A new PCR assay for simultaneous studies of  
700 Leucocytozoon, Plasmodium, and Haemoproteus from avian blood. *J. Parasitol.* 90, 797–802.  
701 doi:10.1645/GE-184R1.
- 702 Hisaeda, H., Maekawa, Y., Iwakawa, D., Okada, H., Himeno, K., Kishihara, K., et al. (2004). Escape  
703 of malaria parasites from host immunity requires CD4+ CD25+ regulatory T cells. *Nat. Med.* 10,  
704 29–30. doi:10.1038/nm975.
- 705 Idaghdour, Y., Quinlan, J., Goulet, J.-P., Berghout, J., Gbeha, E., Bruat, V., et al. (2012). Evidence for  
706 additive and interaction effects of host genotype and infection in malaria. *Proc. Natl. Acad. Sci.*  
707 *U. S. A.* 109, 16786–93. doi:10.1073/pnas.1204945109.
- 708 Josling, G. A. a, Petter, M., Oehring, S. C. C., Gupta, A. P. P., Dietz, O., Wilson, D. W. W., et al.  
709 (2015). A Plasmodium Falciparum Bromodomain Protein Regulates Invasion Gene Expression.  
710 *Cell Host Microbe* 17, 741–751. doi:10.1016/j.chom.2015.05.009.
- 711 Kersey, P. J., Allen, J. E., Armean, I., Boddu, S., Bolt, B. J., Carvalho-Silva, D., et al. (2015).  
712 Ensembl Genomes 2016: more genomes, more complexity. *Nucleic Acids Res.* 44, D574–80.  
713 doi:10.1093/nar/gkv1209.
- 714 Koutsovoulos, G., Kumar, S., Laetsch, D. R., Stevens, L., Daub, J., and Conlon, C. (2016). No  
715 evidence for extensive horizontal gene transfer in the genome of the tardigrade Hypsibius  
716 dujardini. 1–6. doi:10.1073/pnas.1600338113.
- 717 Križanauskienė, A., Hellgren, O., Kosarev, V., Sokolov, L., Bensch, S., and Valkiūnas, G. (2006).  
718 Variation in host specificity between species of avian hemosporidian parasites: evidence from  
719 parasite morphology and cytochrome B gene sequences. *J. Parasitol.* 92, 1319–24.  
720 doi:10.1645/GE-873R.1.
- 721 Lachish, S., Knowles, S. C. L., Alves, R., Wood, M. J., and Sheldon, B. C. (2011). Fitness effects of  
722 endemic malaria infections in a wild bird population: The importance of ecological structure. *J.*  
723 *Anim. Ecol.* 80, 1196–1206. doi:10.1111/j.1365-2656.2011.01836.x.
- 724 Lampa, S., Dahlo, M., Olason, P., Hagberg, J., and Spjuth, O. (2013). Lessons learned from  
725 implementing a national infrastructure in Sweden for storage and analysis of next-generation  
726 sequencing data. *Gigascience* 2, 9. doi:10.1186/2047-217X-2-9.
- 727 Langmead, B., and Salzberg, S. L. (2012). Fast gapped-read alignment with Bowtie 2. *Nat. Methods*  
728 9, 357–9. doi:10.1038/nmeth.1923.
- 729 Lapp, S. A., Mok, S., Zhu, L., Wu, H., Preiser, P. R., Bozdech, Z., et al. (2015). Plasmodium knowlesi  
730 gene expression differs in ex vivo compared to in vitro blood-stage cultures. *Malar. J.* 14, 110.  
731 doi:10.1186/s12936-015-0612-8.
- 732 Lauron, E. J., Aw Yeang, H. X., Taffner, S. M., and Sehgal, R. N. M. (2015). De novo assembly and  
733 transcriptome analysis of Plasmodium gallinaceum identifies the Rh5 interacting protein (ripr),  
734 and reveals a lack of EBL and RH gene family diversification. *Malar. J.* 14, 296.  
735 doi:10.1186/s12936-015-0814-0.



- 736 Lauron, E. J., Oakgrove, K. S., Tell, L. a, Biskar, K., Roy, S. W., and Sehgal, R. N. M. (2014).  
737 Transcriptome sequencing and analysis of *Plasmodium gallinaceum* reveals polymorphisms and  
738 selection on the apical membrane antigen-1. *Malar. J.* 13, 382. doi:10.1186/1475-2875-13-382.
- 739 LeRoux, M., Lakshmanan, V., and Daily, J. P. (2009). *Plasmodium falciparum* biology: analysis of in  
740 vitro versus in vivo growth conditions. *Trends Parasitol.* 25, 474–481.  
741 doi:10.1016/j.pt.2009.07.005.
- 742 Li, B., and Dewey, C. N. (2011). RSEM: accurate transcript quantification from RNA-Seq data with  
743 or without a reference genome. *BMC Bioinformatics* 12, 323. doi:10.1186/1471-2105-12-323.
- 744 Li, W., and Godzik, A. (2006). Cd-hit: A fast program for clustering and comparing large sets of  
745 protein or nucleotide sequences. *Bioinformatics* 22, 1658–1659.  
746 doi:10.1093/bioinformatics/btl158.
- 747 Love, M. I., Huber, W., and Anders, S. (2014). Moderated estimation of fold change and dispersion  
748 for RNA-seq data with DESeq2. *Genome Biol.* 15, 550. doi:10.1101/002832.
- 749 Mackinnon, M. J., Gaffney, D. J., and Read, A. F. (2002). Virulence in rodent malaria: Host genotype  
750 by parasite genotype interactions. *Infect. Genet. Evol.* 1, 287–296. doi:10.1016/S1567-  
751 1348(02)00039-4.
- 752 Martinez, C., Marzec, T., Smith, C. D., Tell, L. A., and Sehgal, R. N. M. (2013). Identification and  
753 expression of maeb1, an erythrocyte-binding gene, in *Plasmodium gallinaceum*. *Parasitol. Res.*  
754 112, 945–954. doi:10.1007/s00436-012-3211-4.
- 755 Martinsen, E. S., and Perkins, S. L. (2013). “The diversity of *Plasmodium* and other haemosporidians:  
756 The intersection of taxonomy, phylogenetics and genomics,” in *Malaria parasites: comparative  
757 genomics, evolution and molecular biology*. (Caister Academic Press, Norfolk), 1–15.
- 758 Mueller, C., Klages, N., Jacot, D., Santos, J. M., Cabrera, A., Gilberger, T. W., et al. (2013). The  
759 toxoplasma protein ARO mediates the apical positioning of rhoptry organelles, a prerequisite for  
760 host cell invasion. *Cell Host Microbe* 13, 289–301. doi:10.1016/j.chom.2013.02.001.
- 761 Niang, M., Bei, A. K., Madnani, K. G., Pelly, S., Dankwa, S., Kanjee, U., et al. (2014). STEVOR is a  
762 *Plasmodium falciparum* erythrocyte binding protein that mediates merozoite invasion and  
763 rosetting. *Cell Host Microbe* 16, 81–93. doi:10.1016/j.chom.2014.06.004.
- 764 Opitz, C., and Soldati, D. (2002). “The glideosome”: A dynamic complex powering gliding motion  
765 and host cell invasion by *Toxoplasma gondii*. *Mol. Microbiol.* 45, 597–604. doi:10.1046/j.1365-  
766 2958.2002.03056.x.
- 767 Otto, T. D., Rayner, J. C., Böhme, U., Pain, A., Spottiswoode, N., Sanders, M., et al. (2014). Genome  
768 sequencing of chimpanzee malaria parasites reveals possible pathways of adaptation to human  
769 hosts. *Nat. Commun.* 5, 4754. doi:10.1038/ncomms5754.
- 770 Otto, T. D., Wilinski, D., Assefa, S., Keane, T. M., Sarry, L. R., Böhme, U., et al. (2010). New  
771 insights into the blood-stage transcriptome of *Plasmodium falciparum* using RNA-Seq. *Mol.*  
772 *Microbiol.* 76, 12–24. doi:10.1111/j.1365-2958.2009.07026.x.
- 773 Pages, H., Aboyoun, P., Gentleman, R., and DebRoy, S. (2015). Biostrings: String objects  
774 representing biological sequences, and matching algorithms. *R Packag. version 2.36.1*.
- 775 Palinauskas, V., Valkiūnas, G., Bolshakov, C. V, and Bensch, S. (2008). *Plasmodium relictum*  
776 (lineage P-SGS1): effects on experimentally infected passerine birds. *Exp. Parasitol.* 120, 372–  
777 80. doi:10.1016/j.exppara.2008.09.001.
- 778 Palinauskas, V., Valkiūnas, G., Bolshakov, C. V, and Bensch, S. (2011). *Plasmodium relictum*  
779 (lineage SGS1) and *Plasmodium ashfordi* (lineage GRW2): the effects of the co-infection on  
780 experimentally infected passerine birds. *Exp. Parasitol.* 127, 527–33.  
781 doi:10.1016/j.exppara.2010.10.007.
- 782 Pauli, M., Chakarov, N., Rupp, O., Kalinowski, J., Goesmann, A., Sorenson, M. D., et al. (2015). De  
783 novo assembly of the dual transcriptomes of a polymorphic raptor species and its malarial

- 784 parasite. *BMC Genomics* 16, 1038. doi:10.1186/s12864-015-2254-1.
- 785 Pérez-Tris, J., Hellgren, O., Krizanauskiene, A., Waldenström, J., Secondi, J., Bonneaud, C., et al.  
786 (2007). Within-host speciation of malaria parasites. *PLoS One* 2, e235.  
787 doi:10.1371/journal.pone.0000235.
- 788 R Core Team (2015). R: A language and environment for statistical computing. *R Found. Stat.*  
789 *Comput. Vienna, Austria*. Available at: <https://www.r-project.org/>.
- 790 Recker, M., Buckee, C. O., Serazin, A., Kyes, S., Pinches, R., Christodoulou, Z., et al. (2011).  
791 Antigenic variation in *Plasmodium falciparum* malaria involves a highly structured switching  
792 pattern. *PLoS Pathog.* 7. doi:10.1371/journal.ppat.1001306.
- 793 Reid, A. J., Blake, D. P., Ansari, H. R., Billington, K., Browne, H. P., Bryant, J., et al. (2014).  
794 Genomic analysis of the causative agents of coccidiosis in domestic chickens. *Genome Res.* 24,  
795 1676–1685. doi:10.1101/gr.168955.113.
- 796 de Roode, J. C., Culleton, R., Cheesman, S. J., Carter, R., and Read, A. F. (2004). Host heterogeneity  
797 is a determinant of competitive exclusion or coexistence in genetically diverse malaria  
798 infections. *Proc. Biol. Sci.* 271, 1073–1080. doi:10.1098/rspb.2004.2695.
- 799 Santos, J. M., Graindorge, A., and Soldati-Favre, D. (2012). New insights into parasite rhomboid  
800 proteases. *Mol. Biochem. Parasitol.* 182, 27–36. doi:10.1016/j.molbiopara.2011.11.010.
- 801 Schmieder, R., and Edwards, R. (2011). Quality control and preprocessing of metagenomic datasets.  
802 *Bioinformatics* 27, 863–864. doi:10.1093/bioinformatics/btr026.
- 803 Siau, A., Silvie, O., Franetich, J. F., Yalaoui, S., Marinach, C., Hannoun, L., et al. (2008).  
804 Temperature shift and host cell contact up-regulate sporozoite expression of *Plasmodium*  
805 *falciparum* genes involved in hepatocyte infection. *PLoS Pathog.* 4.  
806 doi:10.1371/journal.ppat.1000121.
- 807 Siegel, T. N., Hon, C.-C., Zhang, Q., Lopez-Rubio, J.-J., Scheidig-Benatar, C., Martins, R. M., et al.  
808 (2014). Strand-specific RNA-Seq reveals widespread and developmentally regulated  
809 transcription of natural antisense transcripts in *Plasmodium falciparum*. *BMC Genomics* 15, 150.  
810 doi:10.1186/1471-2164-15-150.
- 811 Templeton, T. J., and Kaslow, D. C. (1997). Cloning and cross-species comparison of the  
812 thrombospondin-related anonymous protein (TRAP) gene from *Plasmodium knowlesi*,  
813 *Plasmodium vivax* and *Plasmodium gallinaceum*. *Mol. Biochem. Parasitol.* 84, 13–24.  
814 doi:10.1016/S0166-6851(96)02775-2.
- 815 Valkiūnas, G., Zehtindjiev, P., Hellgren, O., Ilieva, M., Iezhova, T. A., and Bensch, S. (2007).  
816 Linkage between mitochondrial cytochrome b lineages and morphospecies of two avian malaria  
817 parasites, with a description of *Plasmodium* (*Novyella*) *ashfordi* sp. nov. *Parasitol. Res.* 100,  
818 1311–22. doi:10.1007/s00436-006-0409-3.
- 819 Videvall, E., Cornwallis, C. K., Palinauskas, V., Valkiūnas, G., and Hellgren, O. (2015). The Avian  
820 Transcriptome Response to Malaria Infection. *Mol. Biol. Evol.* 32, 1255–1267.  
821 doi:10.1093/molbev/msv016.
- 822 Vincensini, L., Fall, G., Berry, L., Blisnick, T., and Braun Breton, C. (2008). The RhopH complex is  
823 transferred to the host cell cytoplasm following red blood cell invasion by *Plasmodium*  
824 *falciparum*. *Mol. Biochem. Parasitol.* 160, 81–89. doi:10.1016/j.molbiopara.2008.04.002.
- 825 Wickham, H. (2009). *ggplot2: elegant graphics for data analysis*. New York: Springer.
- 826 Zehtindjiev, P., Ilieva, M., Westerdahl, H., Hansson, B., Valkiūnas, G., and Bensch, S. (2008).  
827 Dynamics of parasitemia of malaria parasites in a naturally and experimentally infected  
828 migratory songbird, the great reed warbler *Acrocephalus arundinaceus*. *Exp. Parasitol.* 119, 99–  
829 110. doi:10.1016/j.exppara.2007.12.018.
- 830

831 **Tables**

832

833

834 **Table 1. Assembly statistics of the *Plasmodium ashfordi* transcriptome.**

835

|                            | Annotated transcripts | Unannotated transcripts | Complete assembly |
|----------------------------|-----------------------|-------------------------|-------------------|
| Number of contigs          | 7 860                 | 4 094                   | 11 954            |
| Number of bases            | 7 316 007             | 1 694 373               | 9 010 380         |
| Contig length min-max (bp) | 200 – 26 773          | 200 – 4 171             | 200 – 26 773      |
| Median contig length (bp)  | 681.0                 | 321.0                   | 498.0             |
| Mean contig length (bp)    | 930.8                 | 413.9                   | 753.8             |
| GC content (%)             | 21.22                 | 17.26                   | 20.48             |

836

837

838

839 **Table 2. Most highly expressed transcripts in the *Plasmodium ashfordi* transcriptome.**

840

| <i>P. ashfordi</i> transcript | Protein description                       | Species match (blastx) | Mean FPKM <sup>1</sup> |
|-------------------------------|-------------------------------------------|------------------------|------------------------|
| TR71765 c7_g6_i1              | Uncharacterized protein (PY04653)         | <i>P. yoelii</i>       | 218 188.9              |
| TR71765 c7_g7_i1              | Uncharacterized protein (PY01927)         | <i>P. yoelii</i>       | 189 356.5              |
| TR87146 c0_g1_i1              | Uncharacterized protein (PY04656)         | <i>P. yoelii</i>       | 31 677.2               |
| TR55310 c0_g1_i1              | Unannotated <i>P. ashfordi</i> transcript | NA                     | 13 753.1               |
| TR24310 c0_g1_i1              | 70 kd Heat shock-like protein             | <i>P. yoelii</i>       | 6 528.5                |
| TR87393 c0_g5_i1              | Histone H3                                | <i>P. yoelii</i>       | 5 917.4                |
| TR52464 c0_g1_i1              | Uncharacterized protein (PY00146)         | <i>P. yoelii</i>       | 5 756.5                |
| TR69136 c5_g1_i1              | Uncharacterized protein (PFTANZ_01287)    | <i>P. falciparum</i>   | 5 448.1                |
| TR73260 c2_g1_i1              | Uncharacterized protein (PFFCH_03197)     | <i>P. falciparum</i>   | 4 980.4                |
| TR162674 c0_g1_i1             | Histone H4                                | <i>P. falciparum</i>   | 3 769.6                |
| TR55306 c1_g1_i1              | Heat shock protein 86                     | <i>P. vivax</i>        | 3 665.4                |
| TR16018 c0_g1_i1              | Histone H2B                               | <i>Babesia equi</i>    | 2 716.3                |
| TR213315 c0_g1_i1             | Cytochrome c oxidase subunit 1            | <i>P. lutzi</i>        | 2 453.2                |
| TR59776 c0_g2_i1              | Uncharacterized protein (PY07298)         | <i>P. yoelii</i>       | 2 236.1                |
| TR113917 c0_g1_i1             | Uncharacterized protein (PRCDC_1024200)   | <i>P. reichenowi</i>   | 1 994.0                |

841

842 <sup>1</sup>Fragments Per Kilobase of transcript per Million mapped reads (FPKM) is a relative expression  
843 measure normalized for library size and gene length.

844

845

846 **Table 3. Assembled transcripts of genes involved in *Plasmodium* invasion of red blood cells.**

847

| Gene name    | Gene product                                     | Represented by transcripts                                 | Species match (blastx)                                               | Bit score               | e-value                        |
|--------------|--------------------------------------------------|------------------------------------------------------------|----------------------------------------------------------------------|-------------------------|--------------------------------|
| ACT1         | Actin 1                                          | TR215622 c0_g1_i1                                          | <i>P. vivax</i>                                                      | 758.4                   | 5.5E-216                       |
| ALP1         | Actin-like protein 1                             | TR55613 c0_g1_i1                                           | <i>P. vivax</i>                                                      | 619                     | 5.1E-174                       |
| AMA-1        | Apical membrane antigen 1                        | TR118224 c0_g1_i1                                          | <i>P. gallinaceum</i>                                                | 624                     | 2.1E-175                       |
| ARO          | Armadillo-domain containing rhoptry protein      | TR18124 c0_g1_i1<br>TR18124 c0_g2_i1                       | <i>P. knowlesi</i>                                                   | 520<br>501.9            | 1.9E-144<br>6.0E-139           |
| BDP1         | Bromodomain protein 1                            | TR66841 c0_g2_i1<br>TR66841 c0_g2_i2                       | <i>P. falciparum</i>                                                 | 364.8<br>357.1          | 1.9E-97<br>3.9E-95             |
| FBPA         | Fructose-bisphosphate aldolase                   | TR12911 c0_g1_i1<br>TR12911 c0_g2_i1                       | <i>P. cynomolgi</i><br><i>P. berghei</i>                             | 223.8<br>353.2          | 2.5E-55<br>2.7E-94             |
| GAMA         | GPI-anchored micronemal antigen                  | TR16322 c0_g2_i1                                           | <i>P. reichenowi</i>                                                 | 567.4                   | 2.5E-158                       |
| GAP45        | Glideosome-associated protein 45                 | TR34884 c0_g1_i1                                           | <i>P. vivax</i>                                                      | 209.9                   | 3.9E-51                        |
| GAP50        | Glideosome-associated protein 50                 | TR144721 c0_g1_i1                                          | <i>P. knowlesi</i>                                                   | 577.8                   | 1.2E-161                       |
| MAEBL        | Merozoite adhesive erythrocytic binding protein  | TR234951 c0_g1_i1<br>TR99718 c0_g1_i1<br>TR125315 c0_g1_i1 | <i>P. yoelii</i><br><i>P. gallinaceum</i><br><i>P. gallinaceum</i>   | 171.8<br>146.4<br>84.3  | 6.3E-40<br>2.4E-32<br>7.2E-14  |
| MCP1         | Merozoite capping protein 1                      | TR122100 c0_g1_i1                                          | <i>P. berghei</i>                                                    | 164.5                   | 1.7E-37                        |
| MSP1         | Merozoite surface protein 1                      | TR112241 c0_g2_i1<br>TR176579 c0_g1_i1                     | <i>P. relictum</i>                                                   | 368.6<br>134.4          | 4.2E-98<br>1.4E-28             |
| MTIP (MLC1)  | Myosin A tail domain interacting protein         | TR8937 c0_g1_i1                                            | <i>P. vivax</i>                                                      | 295                     | 8.6E-77                        |
| MTRAP        | Merozoite TRAP-like protein                      | TR188691 c0_g2_i1                                          | <i>P. vinckei</i>                                                    | 98.6                    | 1.3E-17                        |
| MYOA         | Myosin A                                         | TR198550 c0_g1_i1                                          | <i>Babesia microti</i>                                               | 199.1                   | 1.5E-47                        |
| RAMA         | Rhoptry-associated membrane antigen              | TR144799 c0_g1_i1                                          | <i>P. knowlesi</i>                                                   | 70.1                    | 5.0E-09                        |
| RALP1        | Rhoptry-associated leucine zipper-like protein 1 | TR7446 c0_g1_i1                                            | <i>P. falciparum</i>                                                 | 102.1                   | 1.2E-18                        |
| RAP1         | Rhoptry-associated protein 1                     | TR115690 c2_g1_i1                                          | <i>P. coatneyi</i>                                                   | 236.1                   | 1.3E-58                        |
| RAP3         | Rhoptry-associated protein 3                     | TR13305 c0_g1_i1                                           | <i>P. falciparum</i>                                                 | 202.6                   | 9.9E-49                        |
| RBP1 (RH1)   | Reticulocyte-binding protein 1                   | TR53756 c1_g1_i1                                           | <i>P. falciparum</i>                                                 | 84.7                    | 8.0E-13                        |
| RBP2 (RH2)   | Reticulocyte-binding protein 2                   | TR208311 c0_g1_i1<br>TR66282 c1_g2_i1                      | <i>P. vivax</i>                                                      | 76.6<br>146.7           | 5.9E-11<br>2.1E-31             |
| RBP2b (RH2b) | Reticulocyte-binding protein 2 homolog B         | TR87235 c1_g1_i1<br>TR35437 c1_g1_i1                       | <i>P. vivax</i><br><i>P. falciparum</i>                              | 97.8<br>86.7            | 8.7E-18<br>1.9E-14             |
| RHOPH1       | High molecular weight rhoptry protein 1 (CLAG9)  | TR7367 c0_g1_i1<br>TR200056 c0_g1_i1<br>TR233854 c0_g1_i1  | <i>P. reichenowi</i><br><i>P. reichenowi</i><br><i>P. falciparum</i> | 272.3<br>82.8<br>61.6   | 7.9E-70<br>2.3E-13<br>4.8E-07  |
| RHOPH2       | High molecular weight rhoptry protein 2          | TR25858 c0_g2_i1<br>TR25858 c0_g3_i1<br>TR175810 c0_g1_i1  | <i>P. vivax</i><br><i>P. fragile</i><br><i>P. vivax</i>              | 542.3<br>335.9<br>180.6 | 7.8E-151<br>5.7E-89<br>3.4E-42 |
| RHOPH3       | High molecular weight rhoptry protein 3          | TR83052 c6_g1_i1                                           | <i>P. falciparum</i>                                                 | 612.8                   | 7.3E-172                       |
| RIPR         | RH5 interacting protein                          | TR49727 c0_g2_i1<br>TR49727 c0_g2_i2                       | <i>P. reichenowi</i><br><i>P. fragile</i>                            | 502.3<br>299.3          | 6.4E-139<br>1.0E-77            |
| ROM1         | Rhomboid protease 1                              | TR178976 c0_g1_i1                                          | <i>P. yoelii</i>                                                     | 102.4                   | 2.4E-19                        |
| ROM4         | Rhomboid protease 4                              | TR92176 c1_g1_i1                                           | <i>P. reichenowi</i>                                                 | 783.5                   | 2.1E-223                       |

|       |                                                |                   |                      |        |          |
|-------|------------------------------------------------|-------------------|----------------------|--------|----------|
| RON2  | Rhoptry neck protein 2                         | TR62454 c0_g1_i1  | <i>P. cynomolgi</i>  | 659.8  | 8.5E-186 |
| RON4  | Rhoptry neck protein 4                         | TR145809 c0_g1_i1 | <i>P. reichenowi</i> | 349.4  | 8.9E-93  |
| RON5  | Rhoptry neck protein 5                         | TR67313 c1_g1_i1  | <i>P. reichenowi</i> | 1105.9 | 0        |
| SUB1  | Subtilisin 1                                   | TR164664 c0_g1_i1 | <i>P. inui</i>       | 636.7  | 3.0E-179 |
| SUB2  | Subtilisin 2                                   | TR169322 c0_g1_i1 | <i>P. inui</i>       | 563.9  | 2.7E-157 |
| TLP   | TRAP-like protein                              | TR153597 c0_g1_i1 | <i>P. falciparum</i> | 440.7  | 3.2E-120 |
| TRAMP | Thrombospondin related apical membrane protein | TR179194 c0_g1_i1 | <i>P. falciparum</i> | 231.1  | 2.1E-57  |
| TRAP  | Thrombospondin related anonymous protein       | TR16495 c0_g1_i1  | <i>P. relictum</i>   | 229.2  | 6.4E-57  |

848

849

850

851



## 852 Figures

853

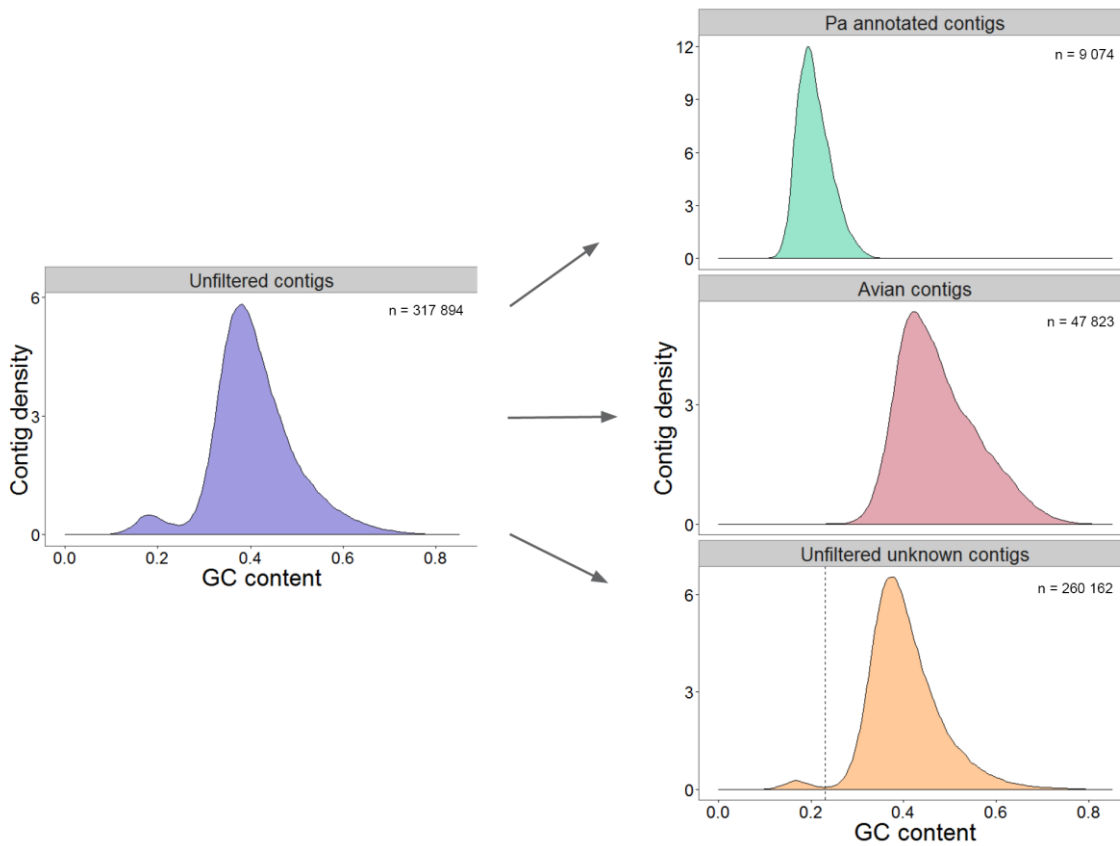

854

855 **Figure 1. Density of contig GC content in the *Plasmodium ashfordi* transcriptome.** In (A) the  
856 initial, unfiltered assembly, (B) the annotated *P. ashfordi* transcriptome assembly, (C) all contigs  
857 giving significant blastx matches to birds, and (D) all unknown contigs before GC % filtering. The  
858 arrows indicate assembly versions before and after initial filtering and cleaning steps. Both the initial,  
859 unfiltered assembly and the assembly with unknown, unfiltered contigs display a bimodal curve,  
860 incorporating both avian and *P. ashfordi* transcripts. The dashed straight line in (D) indicates the 23%  
861 GC cut-off where the unknown transcripts with lower GC content were extracted, filtered, and later  
862 included in the final *P. ashfordi* assembly as unannotated parasite transcripts.

863

864

865

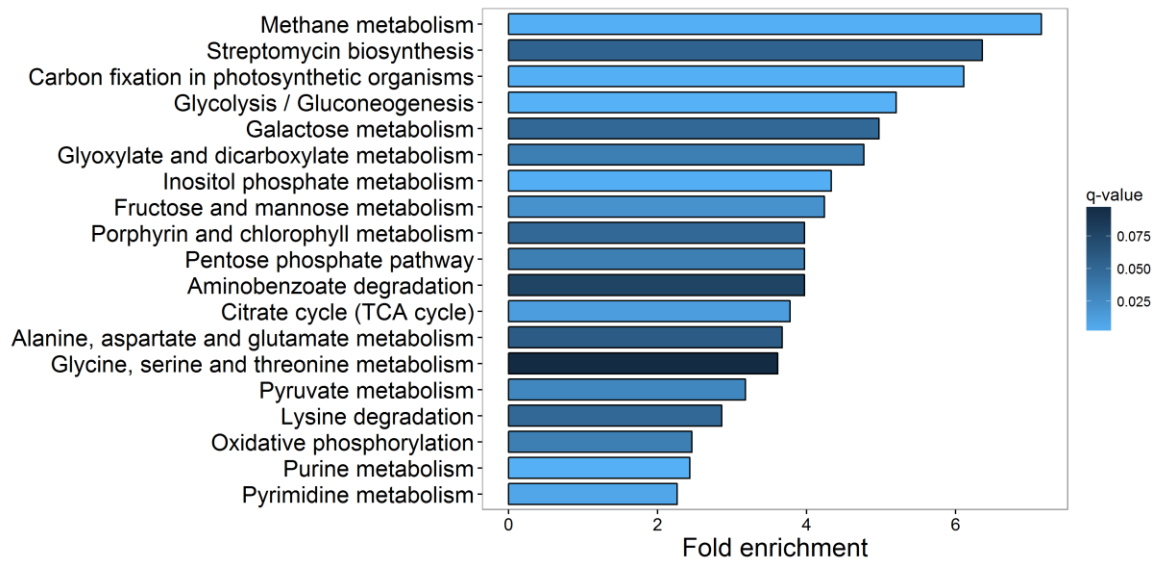

866

867

868 **Figure 2. Enriched metabolic pathways in the *Plasmodium ashfordi* transcriptome.** Significantly  
869 enriched metabolic pathways based on all transcripts in the annotated assembly. The x-axis denotes  
870 fold enrichment of genes in respective pathway compared to the annotation background of *P.*  
871 *falciparum*. Color gradient indicates p-values after Benjamini and Hochberg correction (q-value),  
872 where a lighter blue color signifies increased statistical significance.

873

874

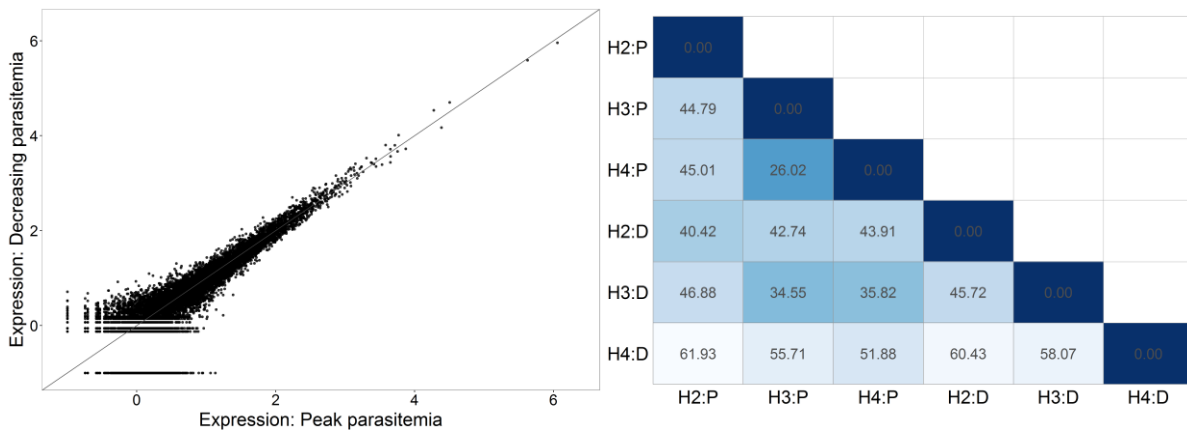

875

876

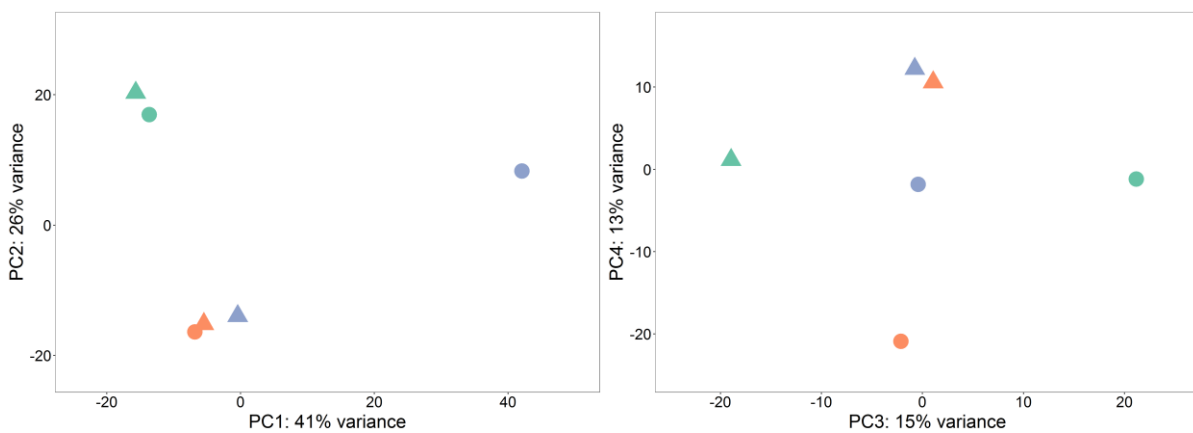

877

878

879

880 **Figure 3. *Plasmodium ashfordi* gene expression in individual hosts during two infection stages.**

881 (A) Scatterplot displaying expression levels of all transcripts in the *P. ashfordi* transcriptome (n = 11

882 954). The axes show log-transformed normalized mean expression values + 0.1 during peak

883 parasitemia stage (x-axis; n = 3) and decreasing parasitemia stage (y-axis; n = 3). (B) Heatmap

884 portraying Euclidian distance measures between parasite expression profiles in different hosts during

885 two time points. Lighter color signifies greater distance. H = host, P = peak parasitemia, and D =

886 decreasing parasitemia. The distances between parasite transcriptomes in the decreasing parasitemia

887 stage and to the samples from same host sampled during peak parasitemia stage constitute the shortest

888 distances for all the samples during decreasing parasitemia. (C-D) Principal component analysis

889 (PCA) plots show clustering of samples based on variation in regularized log-transformed normalized

890 gene expression. (C) shows principal component 1 and 2, and (D) shows principal component 3 and 4.

891 Colors of parasite transcriptomes illustrate which host they are sampled from: host 2 = green =

892 orange, host 4 = purple. Triangles and circles, respectively indicate transcriptomes sampled during

893 peak and decreasing parasitemia stages.

894

895

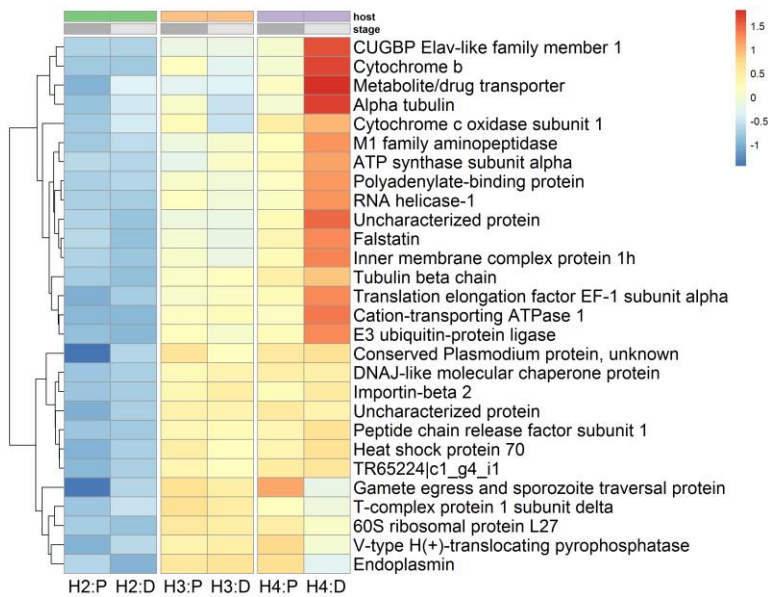

896

897

898 **Figure 4. Expression of *Plasmodium ashfordi* transcripts differentially expressed between**  
899 **individual hosts.** Heatmap of relative gene expression levels of 28 significant transcripts (rows)  
900 between parasites in different hosts (columns). Warmer color signifies higher expression, and blue  
901 color indicates lower transcript expression. Hierarchical clustering of genes is portrayed with a  
902 dendrogram. H = host, P = peak parasitemia (dark grey), and D = decreasing parasitemia (light grey).  
903 Same color scheme for hosts as in Figure 3C-D applies (host 2 = green, host 3 = orange, host 4 =  
904 purple). To compare across genes, expression levels have been normalized with respect to library size,  
905 regularized log-transformed, and scaled and centered around zero to give Z-scores.

906

907

908

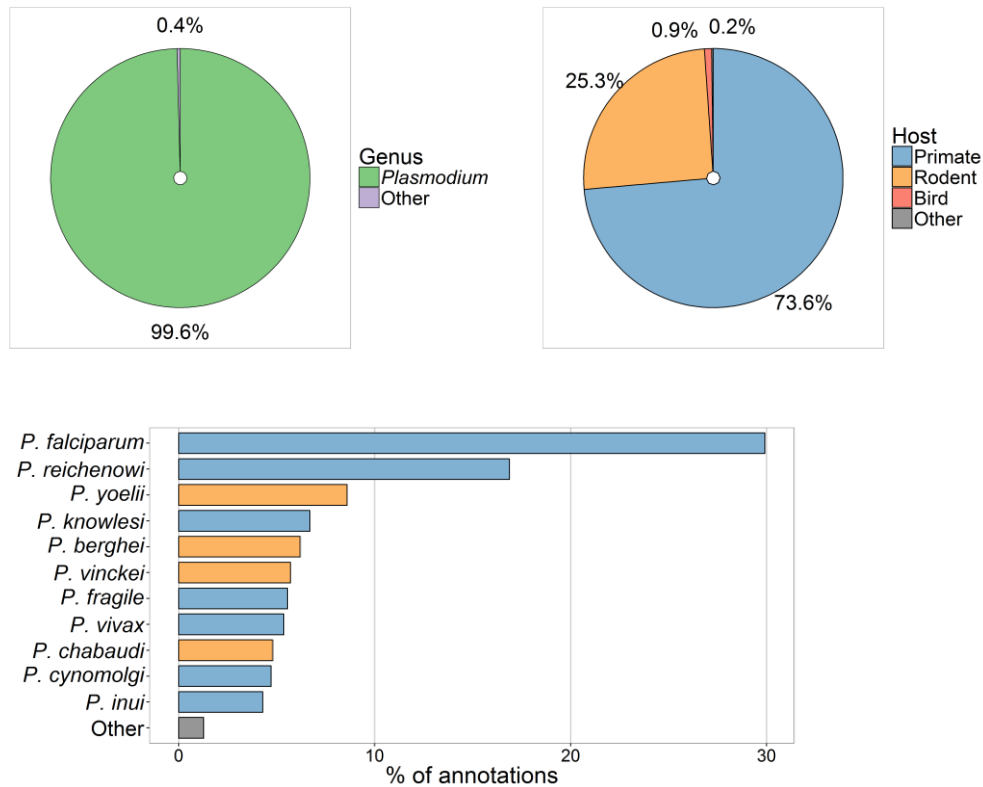

909  
910

911  
912

913 **Figure 5. Distribution of apicomplexan parasites significantly matching the *Plasmodium***  
914 ***ashfordi* transcripts. (A) Pie chart showing the distribution of *P. ashfordi* annotations giving**  
915 **significant blast matches to *Plasmodium* spp. and parasites of other genera. (B) Pie chart showing the**  
916 **distribution of annotations giving significant matches to parasites infecting primates, rodents, birds,**  
917 **and other hosts. (C) Bar plot displaying the percentage of annotated contigs giving significant**  
918 **matches to parasite species. Similar color scheme as in (B) applies, i.e. blue signifies a parasite of**  
919 **primates, orange a parasite of rodents. The “other” category contains here all other apicomplexan**  
920 **species, including bird parasites, comprising a total of 20 different species (complete list can be found**  
921 **in Supplementary Table S5).**

922  
923  
924

925

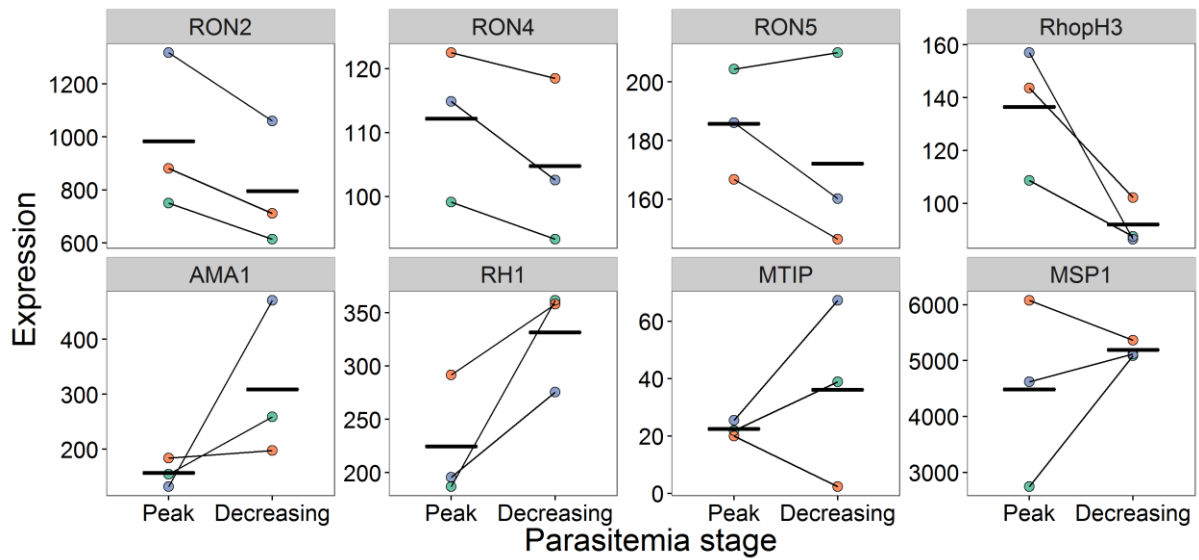

926

927 **Figure 6. Individual gene expression plots for some of the *Plasmodium ashfordi* transcripts**  
928 **involved in host cell invasion.** Line plots displaying normalized parasite gene expression in each  
929 individual host over the two sampled parasitemia stages. Host 2 is depicted in green, host 3 in orange,  
930 and host 4 in purple. Thick horizontal lines indicate mean expression levels in each stage.

931

932

## 933 **Supplementary Figures**

934

935 **Supplementary Figures S1 – S5.**

936 See attached supplementary pdf file.

937

938

939

## 940 **Supplementary Tables**

941

942 Please contact EV for details regarding unpublished supplementary tables.

943

944

945 **Supplementary Table S1.** Annotation information of all annotated *P. ashfordi* transcripts (n =  
946 7 860).

947 [csv file]

948

949

950 **Supplementary Table S2.** *P. ashfordi* genes annotated with the gene ontology term “kinase activity”  
951 (n = 95).

952 [csv file]

953

954

955 **Supplementary Table S3.** Normalized expression levels of all *P. ashfordi* transcripts (n = 11 954) in  
956 individual hosts during peak and decreasing parasitemia stages.

957 [csv file]

958

959

960 **Supplementary Table S4.** *P. ashfordi* transcripts that were significantly differentially expressed  
961 between host individuals (n = 28).

962 [csv file]

963

964

965 **Supplementary Table S5.** Species distribution matches from the annotated transcripts of *P. ashfordi*.

966 [csv file]

967

968
